# Supplementary material for: Effect of Lactate Minimum Speed-Guided Training on the Fluid, Electrolyte and Acid-Base Status of Horses
Source: MDPI journal article supplement (doi:10.3390/ani13203290), 2023-10-21
Supplement: s1 [file s1]

**Table S2.** Reference values in venous blood of horses.

| Variable                               | Reference range |
|----------------------------------------|-----------------|
| pH                                     | 7.32-7.46 [52]  |
| pCO <sub>2</sub> (mmHg)                | 38-46 [52]      |
| HCO <sub>3</sub> <sup>-</sup> (mmol/L) | 24-30 [52]      |
| BE (mmol/L)                            | 0-6.0 [52]      |
| Lactate (mmol/L)                       | <2 [52]         |
| Na <sup>+</sup> (mmol/L)               | 132-146 [52]    |
| K <sup>+</sup> (mmol/L)                | 3.0-5.0 [52]    |
| Cl <sup>-</sup> (mmol/L)               | 99-109 [52]     |
| iCa <sup>2+</sup> (mmol/L)             | 1.4-1.7 [52]    |
| PPT (g/dL)                             | 6.0-7.7 [52]    |
| SID <sub>4</sub> (mmol/L)              | ±40 [20]        |
| AG (mmol/L)                            | 8-13 [21]       |
| SIG (mmol/L)                           | -2 to +6 [21]   |
| A <sub>tot</sub> (mmol/L)              | 12-15 [20]      |

## References

52. Constable, P.D.; Hinchcliff, K.W.; Done, S.H.; Grünberg, W. (2017) *Veterinary medicine: a textbook of the disease of cattle, horses, sheep, pigs, and goats*, 11th ed., Elsevier Ltd, St. Louis.
20. Constable, P.D. A simplified strong ion model for acid-base equilibria: application to horse plasma. *J. Appl. Physiol.* **1997**, 83, 297–311.
21. Constable, P.D.; Hinchcliff, K.W.; Muir, W.W. Comparision of anion gap and strong ion gap as predictors of unmeasured strong ion concentrion in plasma and serum from horses. *Am. J. Vet. Res.* **1998**, 59, 881–887.
