# Supplementary material for: Effect of Lactate Minimum Speed-Guided Training on the Fluid, Electrolyte and Acid-Base Status of Horses
Source: MDPI journal article supplement (doi:10.3390/ani13203290), 2023-10-21
Supplement: s1 [file s1]

**Table S1.** Formulae used.

| Variable              | Formulae                                                         |
|-----------------------|------------------------------------------------------------------|
| SID <sub>4</sub> [20] | $SID_4 = (Na^+ + K^+) - (Cl^- + lactate)$                        |
| AG [21]               | $AG = (Na^+ + K^+) - (Cl^- + HCO_3^-)$                           |
| SIG [21]              | $SIG = \left( \frac{[A_{tot}]}{[1 + 10^{6.65-pH}]} \right) - AG$ |
| A <sub>tot</sub> [20] | $A_{tot} = 2.24 \times PPT \text{ (g/dL)}$                       |

20. Constable, P.D. A simplified strong ion model for acid-base equilibria: application to horse plasma. *J. Appl. Physiol.* **1997**, 83, 297–311.

21. Constable, P.D.; Hinchcliff, K.W.; Muir, W.W. Comparison of anion gap and strong ion gap as predictors of unmeasured strong ion concentration in plasma and serum from horses. *Am. J. Vet. Res.* **1998**, 59, 881–887.
